# Supplementary material for: Genetic Diversity in Introduced Populations with an Allee Effect
Source: Oxford University Press journal article supplement (doi:10.1534/genetics.114.167551), 2014-07-09
Supplement: genetics.114.167551-7.pdf [file genetics.114.167551-7.pdf]

## File S5 Consequences of a neglected Allee effect

128 Using the ABC framework again, we explored the consequences of neglecting the Allee effect when estimating other  
demographic parameters: the founder population size  $N_0$ , the growth parameter  $r$ , and the number of generations since  
130 the founding event. We generated 2000 pseudo-observed data sets from our stochastic model, 1000 without an Allee effect  
and 1000 with an Allee effect and a critical population size of 50. As the basis for estimation in ABC, we used 100,000  
132 data sets that were simulated from a model without an Allee effect. To also explore the consequences of neglecting  
stochasticity, we considered two versions of the model without an Allee effect: our stochastic model with  $a = 0$  and a  
134 modified version where we removed as much stochasticity as possible. That is, the population size in the next generation  
was not drawn from a Poisson distribution, but was set to  $\mathbb{E}[N_{t+1}]$  if this value was an integer. Otherwise, we randomly  
136 set  $N_{t+1}$  to the next smallest or next largest integer with the respective probabilities chosen such that Equation (1) was  
fulfilled.

138 The priors for the demographic parameters of interest were as follows:  $r \sim \text{unif}([0.05, 0.1])$  and  $n_g \sim \text{unif}(\{30, \dots, 500\})$ ,  
where  $\text{unif}$  stands for the uniform distribution. To generate values for  $N_0$ , we first drew  $Y \sim \text{unif}([\ln(5), \ln(80)])$ , and then  
140 set  $N_0$  to  $e^Y$ , rounded to the next integer. The other parameters were fixed:  $k_0 = 10,000$ ,  $k_1 = 1000$ ,  $\mu = 0.001$ ,  $n_s = 10$ .  
For each data set, we retried simulating with the same parameter combination until we obtained a successful population  
142 with  $N_{n_g} \geq n_s$ . We generated 100 independent genealogies for samples of size  $n_s$  taken at time  $n_g$  and computed means  
and variances of the entries of the site-frequency spectrum as described in File S4. Using partial least squares regression  
144 on the first 10,000 simulated data sets, we reduced this information to 20 components that served as summary statistics  
for ABC. As above, we used the R package *abc* (Csilléry *et al.* 2012) with a tolerance of 1 % and the option ‘loclinear’.  
146 In Figure S8, we compare the quality of parameter estimation across the four possible combinations of whether or not  
the true model includes an Allee effect and whether the model used for estimation was stochastic or deterministic.

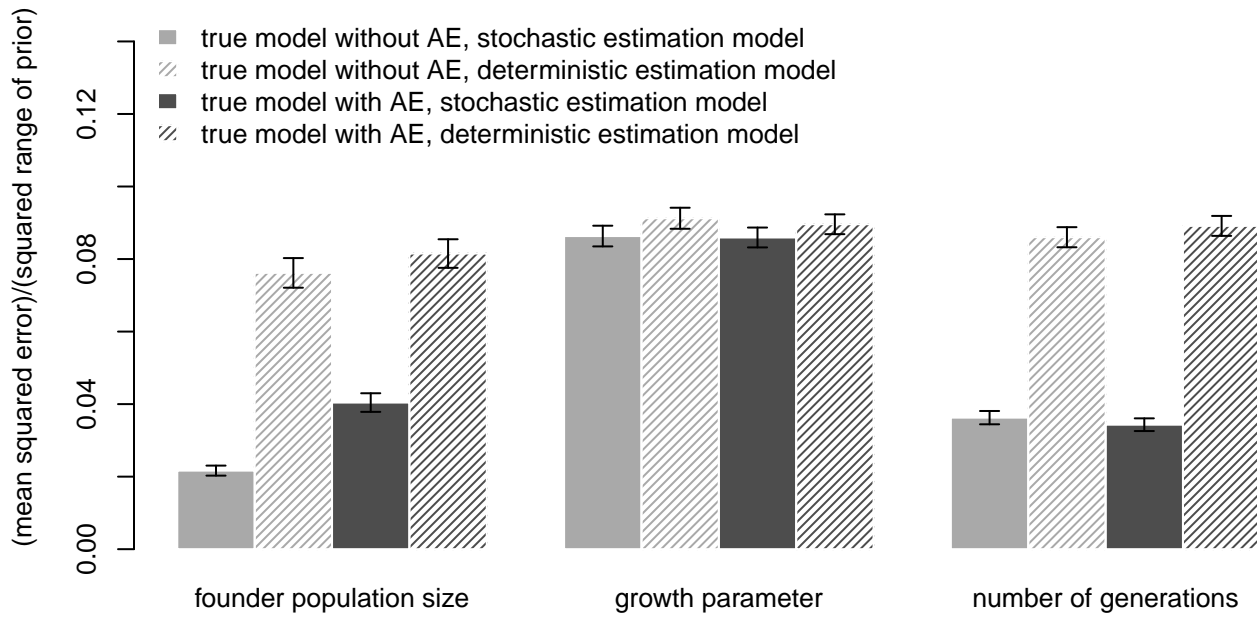

**Figure S8** Mean squared error (MSE)  $\pm$  its standard error, relative to the squared range of the prior for different demographic parameters in an Approximate Bayesian Computation analysis that neglects the Allee effect.
